# Supplementary material for: Oleate Hydratase from Lactobacillus rhamnosus ATCC 53103: A FADH2-Dependent Enzyme with Remarkable Industrial Potential
Source: MDPI journal article supplement (doi:10.3390/catal11091051), 2021-08-30
Supplement: s1 [file s1]

# Supplementary Materials

Article

## Oleate Hydratase from *Lactobacillus rhamnosus* ATCC 53103: a FADH<sub>2</sub>-Dependent Enzyme with Remarkable Industrial Potential

Stefano Serra \*, Davide De Simeis, Stefano Marzorati and Mattia Valentino

Consiglio Nazionale delle Ricerche (C.N.R.) Istituto di Scienze e Tecnologie Chimiche, Via Mancinelli 7, 20131 Milano, Italy; davide.desimeis01@gmail.com (D.D.S.); stefano.marzorati@scitec.cnr.it (S.M.); mattia.valentino@scitec.cnr.it (M.V.)

\* Correspondence: stefano.serra@cnr.it or stefano.serra@polimi.it; Tel.: +39-02-2399 3076

### Table of contents:

Preparative synthesis of (R)-10-hydroxystearic acid

1. Figure S1: GC-MS analysis of the starting oleic acid used
2. Figure S2: GC-MS analysis of the crude (R)-10-hydroxystearic acid obtained after filtration
3. Figure S3: GC-MS analysis of recrystallized (R)-10-hydroxystearic acid
4. Figure S4: determination of the enantiomeric purity of the obtained 10-hydroxystearic acid by means of <sup>1</sup>H-NMR analysis of its (S)-O-acetylmandelates ester.

Figure S4a: Acetylmandelate ester of a sample of (R)-10-HSA methyl ester with 22% ee.

Enlargement of the methyl ester signal.

Figure S4b: Acetylmandelate ester of a sample of the (R)-10-HSA methyl ester obtained by preparative synthesis (paragraph 3.7). Enlargement of the methyl ester signal.

**Figure S1**

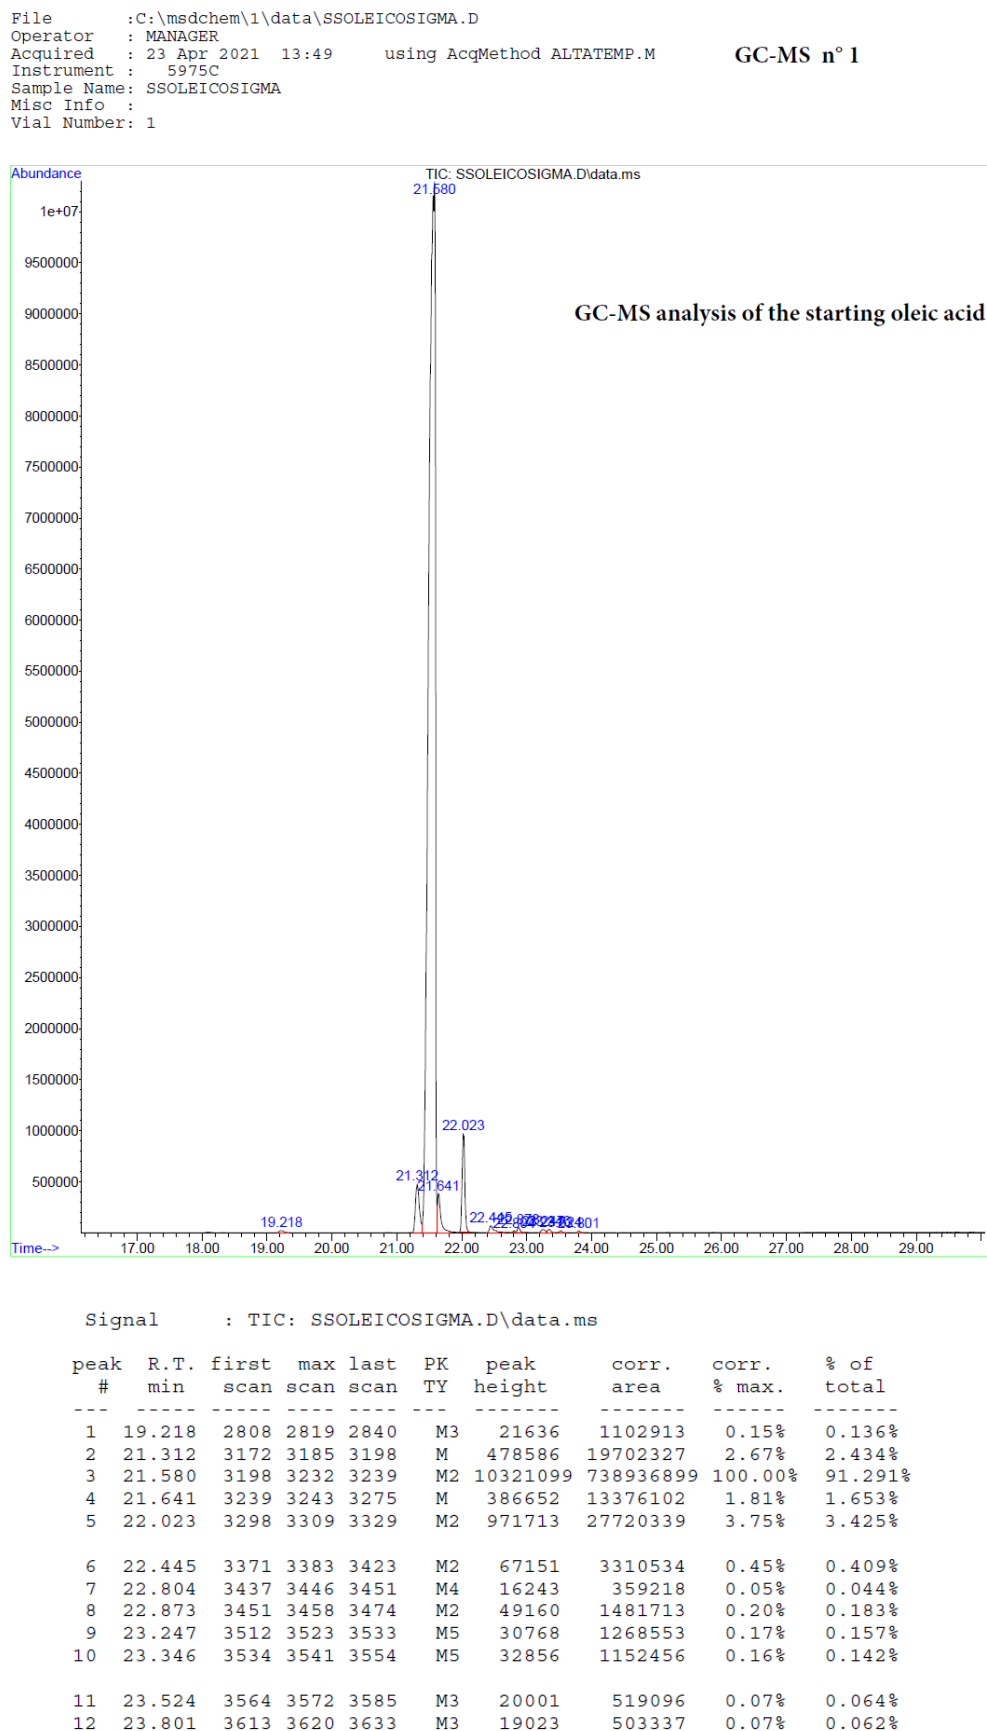

**Figure S1.** GC-MS analysis of the starting oleic acid used.

**Figure S2**

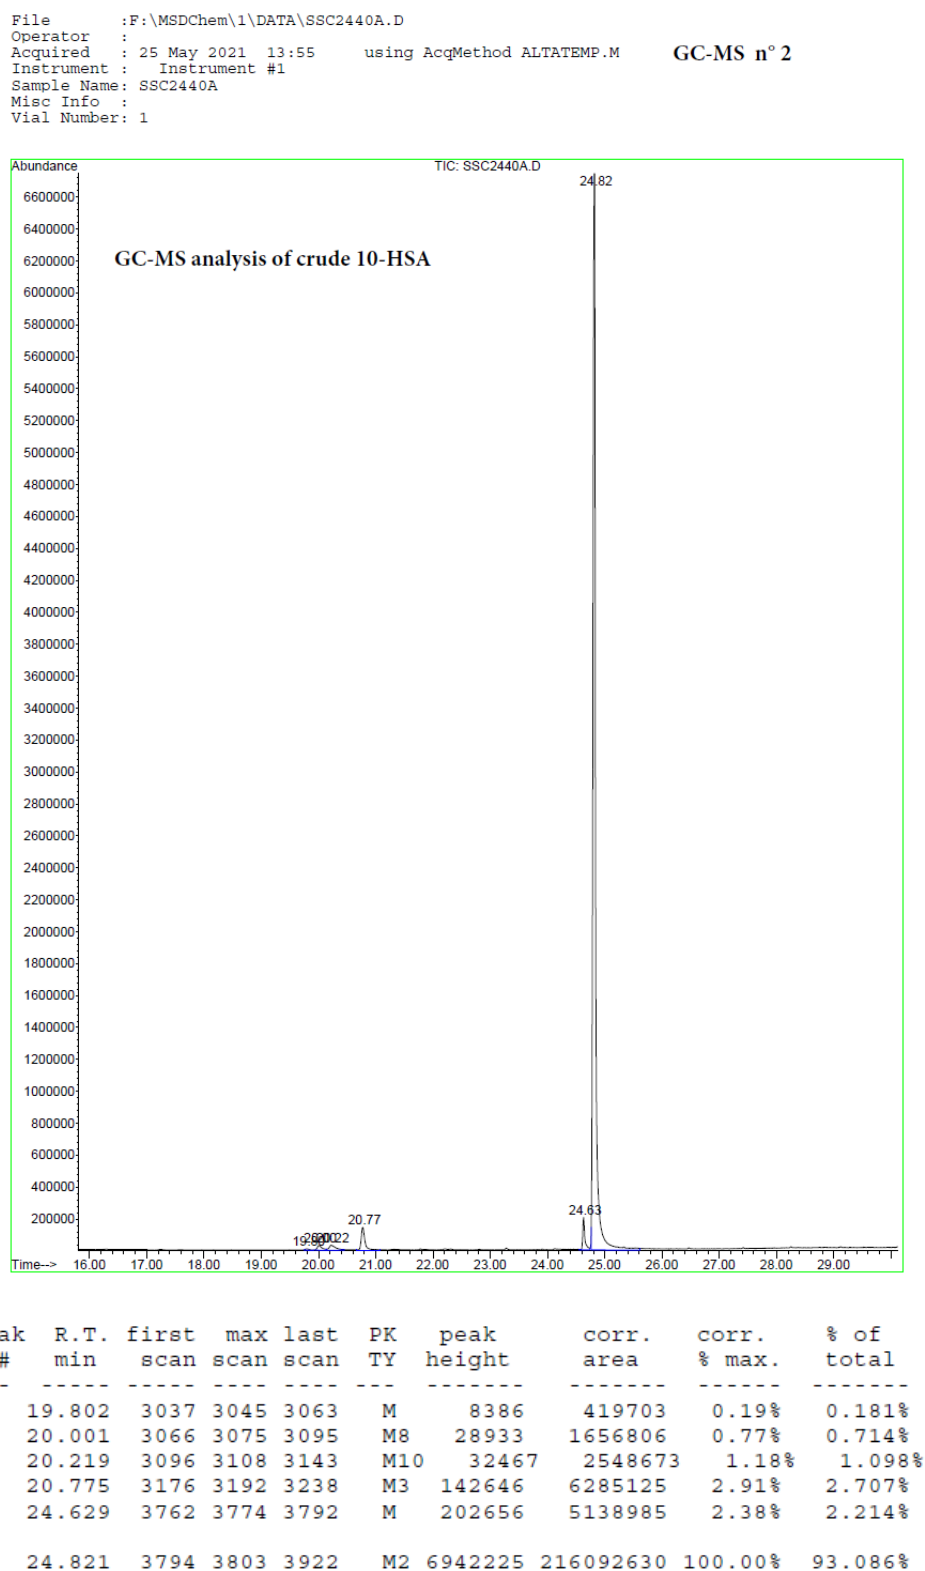

**Figure S2.** GC-MS analysis of the crude (*R*)-10-hydroxystearic acid obtained after filtration.

**Figure S3**

File :F:\MSDCHEM\1\DATA\SSC2440C.D  
 Operator :  
 Acquired : 25 May 2021 14:37 using AcqMethod ALTATEMP.M  
 Instrument : Instrument #1  
 Sample Name: SSC2440C  
 Misc Info :  
 Vial Number: 2

GC-MS n° 3

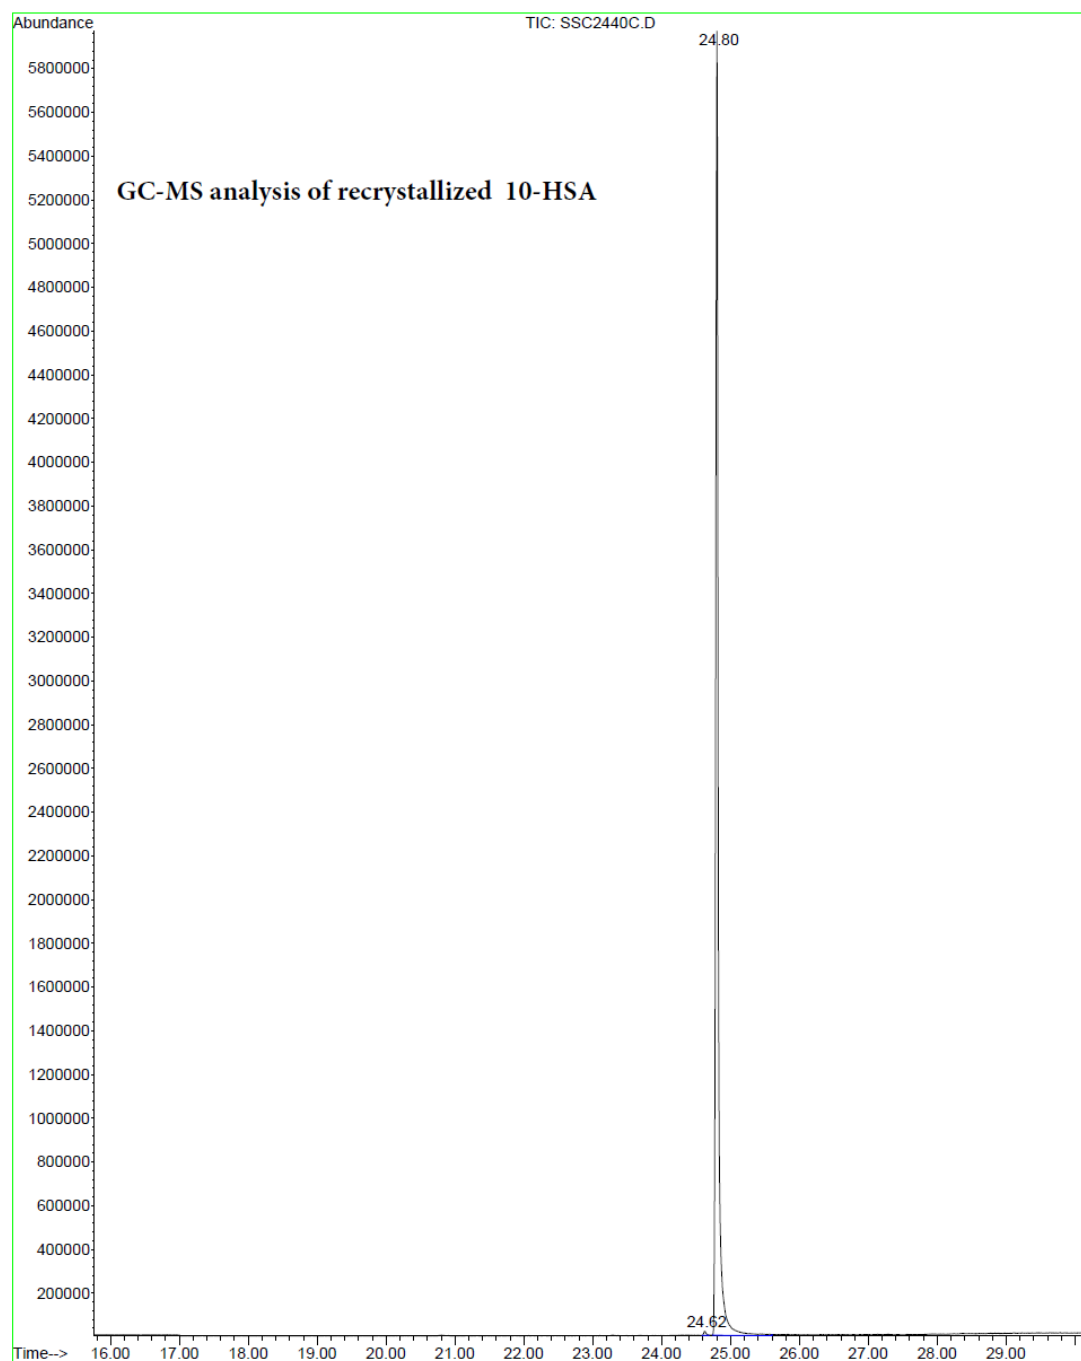

| peak<br># | R.T.<br>min | first<br>scan | max<br>scan | last<br>scan | PK<br>TY | peak<br>height | corr.<br>area | corr.<br>% max. | % of<br>total |
|-----------|-------------|---------------|-------------|--------------|----------|----------------|---------------|-----------------|---------------|
| 1         | 24.624      | 3768          | 3773        | 3782         | M4       | 19712          | 463066        | 0.29%           | 0.291%        |
| 2         | 24.802      | 3791          | 3800        | 3920         | M        | 5964380        | 158804572     | 100.00%         | 99.709%       |

**Figure S3.** GC-MS analysis of recrystallized (R)-10-hydroxystearic acid.

**Figure S4**

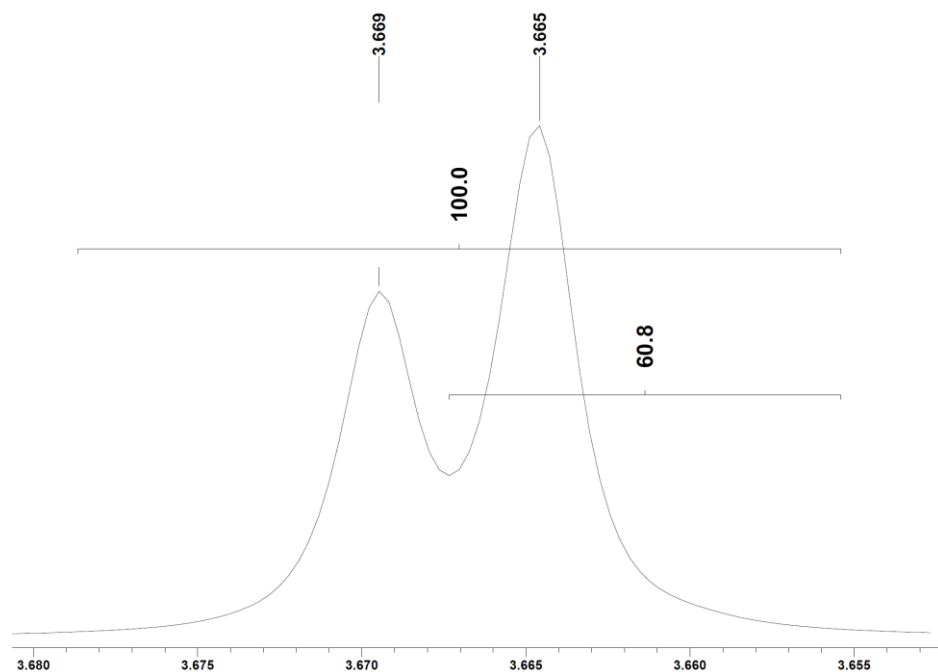

**Figure S4a** - Acetylmandelate ester of a sample of (*R*)-10-HSA methyl ester with 22% ee.  
Enlargement of the methyl ester signal.

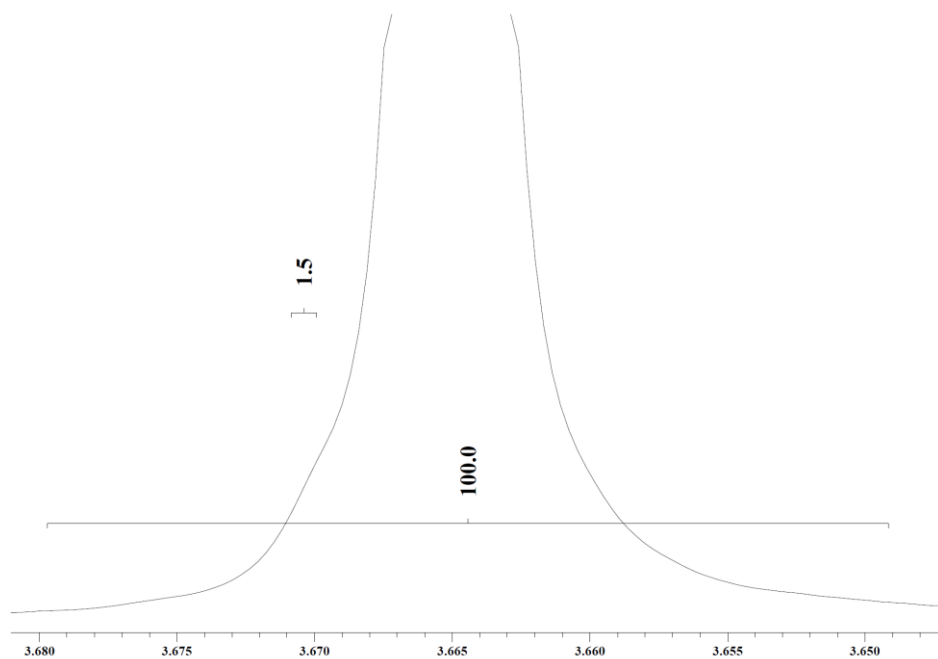

**Figure S4b** - Acetylmandelate ester of a sample of the (*R*)-10-HSA methyl ester obtained by preparative synthesis (paragraph 3.7). Enlargement of the methyl ester signal.
